# Supplementary material
Source: PubMed Central journal article supplement (PMC3986197)
Supplement: 1314447111_pnas.201314447SI.pdf [file 1314447111_pnas.201314447SI.pdf]

# Supporting Information

Ingaramo et al. 10.1073/pnas.1314447111

## SI Text

### Two-Photon Multifocal Structured Illumination Microscopy Implementation

Implementation of two-photon multifocal structured illumination microscopy (2P-MSIM) required substantial modifications to the previous MSIM design (1). The original MSIM used a digital micromirror device which works well in producing evenly spaced sparse excitation foci. However, as only a tiny fraction of the mirrors illuminate the sample at any instant, this approach is extremely inefficient at delivering excitation light to the sample. As discussed previously (1), a design similar to a swept-field microscope would be more efficient and perhaps even necessary for multiphoton excitation in MSIM, where signal is proportional to the peak intensity squared. Several configurations for multifocal multiphoton instruments have been reported. One option would have been to devise a multiplexing unit to split the beam into many beamlets which could be scanned over the sample (2–4), similar to the commercial TriM scope (LaVision BioTec). In fact, a multiphoton SIM technique was published using a TriM microscope

in which multiline scans were used to make striped illumination patterns in the sample (5). A second multifocal approach would be to use a microlens array either in a spinning disk (6–12) or stationary configuration (13, 14). We opted for a simple design which collects images in widefield mode and allows precise control over the pattern and position of excitation spots using a stationary microlens array to generate the sparse foci illumination (Fig. S1). Our initial design relied on the precise orientation of the microlens array and precise spacing of the excitation spots in conjunction with a single galvanometer to control the excitation beam angles. This allowed single-axis translation of the illumination spots over the entire sample to produce as uniform illumination as possible. However, we found a 2D galvanometric scanner as used in a previous multifocal multiphoton microscope (13) was more simple to implement and alleviated the need for precise spot spacing and microlens array orientation to produce uniform illumination. An additional correction for overlapping coverage was implemented in the MSIM analysis software (*Methods, One- and Two-Photon MSIM Data Analysis*). The new version of the analysis software is now available along with the original at <http://code.google.com/p/msim/>.

1. York AG, et al. (2012) Resolution doubling in live, multicellular organisms via multifocal structured illumination microscopy. *Nat Methods* 9(7):749–754.
2. Nielsen T, Fricke M, Hellweg D, Andresen P (2001) High efficiency beam splitter for multifocal multiphoton microscopy. *J Microsc* 201(Pt 3):368–376.
3. Niesner R, Andresen V, Neumann J, Spiecker H, Gunzer M (2007) The power of single and multibeam two-photon microscopy for high-resolution and high-speed deep tissue and intravital imaging. *Biophys J* 93(7):2519–2529.
4. Fittinghoff DN, Squier JA (2000) Time-decorrelated multifocal array for multiphoton microscopy and micromachining. *Opt Lett* 25(16):1213–1215.
5. Andresen V, et al. (2012) High-resolution intravital microscopy. *PLoS ONE* 7(12): e50915.
6. Bewersdorf J, Pick R, Hell SW (1998) Multifocal multiphoton microscopy. *Opt Lett* 23(9):655–657.
7. Fujita K, et al. (1999) Real-time imaging of two-photon-induced fluorescence with a microlens-array scanner and a regenerative amplifier. *J Microsc* 194(Pt 2-3):528–531.
8. Straub M, Lodemann P, Holroyd P, Jahn R, Hell SW (2000) Live cell imaging by multifocal multiphoton microscopy. *Eur J Cell Biol* 79(10):726–734.
9. Egner A, Hell SW (2000) Time multiplexing and parallelization in multifocal multiphoton microscopy. *J Opt Soc Am A Opt Image Sci Vis* 17(7):1192–1201.
10. Grant DM, et al. (2005) Optically sectioned fluorescence lifetime imaging using a Nipkow disk microscope and a tunable ultrafast continuum excitation source. *Opt Lett* 30(24):3353–3355.
11. Kobayashi M, et al. (2002) Second-harmonic-generation microscope with a microlens array scanner. *Opt Lett* 27(15):1324–1326.
12. Shimozawa T, et al. (2013) Improving spinning disk confocal microscopy by preventing pinhole cross-talk for intravital imaging. *Proc Natl Acad Sci USA* 110(9): 3399–3404.
13. Buist AH, Müller M, Squier J, Brakenhoff GJ (1998) Real time two-photon absorption microscopy using multi point excitation. *J Microsc* 192(2):217–226.
14. Egner A, Jakobs S, Hell SW (2002) Fast 100-nm resolution three-dimensional microscope reveals structural plasticity of mitochondria in live yeast. *Proc Natl Acad Sci USA* 99(6):3370–3375.



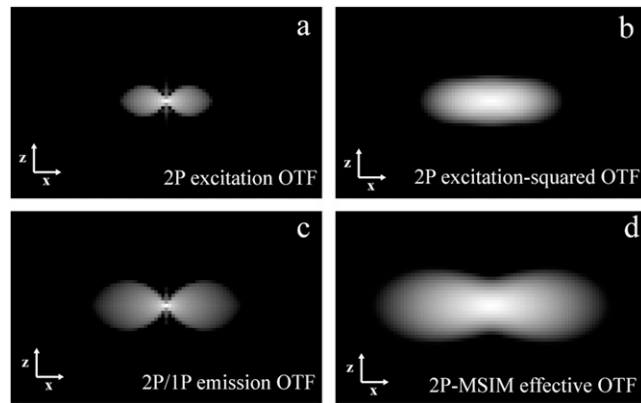

**Fig. 53.** Simulation of the optical transfer function (OTF) of 2P-MSIM. Logarithms of absolute values of xz slices of each OTF are shown for (A) excitation OTF, (B) excitation-squared OTF, (C) emission OTF, and (D) effective 2P-MSIM OTF. Simulations were implemented using Python as described in [Dataset S1](#).

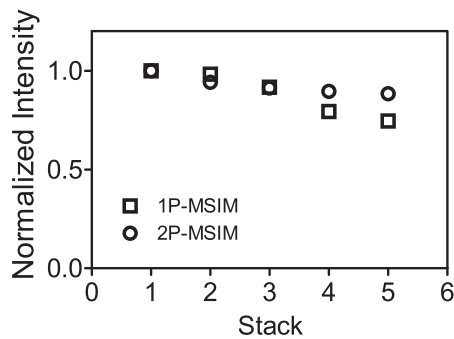

**Fig. 54.** Power levels for one- and two-photon excitation were chosen to equalize photobleaching in a test sample. Alexa Fluor 488 lamin-C-labeled salivary glands were imaged by acquiring 50- $\mu\text{m}$  stacks at 1- $\mu\text{m}$  interslice separation. The power levels shown in this figure produce equivalent bleaching, and correspond to 6  $\mu\text{W}$  of 488-nm laser power (squares) and 1.1 W of 850-nm, two-photon laser power (circles). Power was measured at the right-side port of the microscope. When the slice number was halved, the power settings for the one-photon laser were doubled. These acquisition settings were used for acquisition on all other samples and have upper limits of  $\sim 3.5 \text{ W/cm}^2$  and  $5 \times 10^6 \text{ W/cm}^2$  average intensity within the one- or two-photon spots, respectively. The average intensities over the field of view are calculated to have upper limits of  $\sim 0.2 \text{ W/cm}^2$  and  $\sim 2.9 \times 10^5 \text{ W/cm}^2$  for one- and two-photon illumination, respectively. The two-photon peak intensity is calculated to have an upper limit of  $\sim 4.5 \times 10^{11} \text{ W/cm}^2$  within each spot.

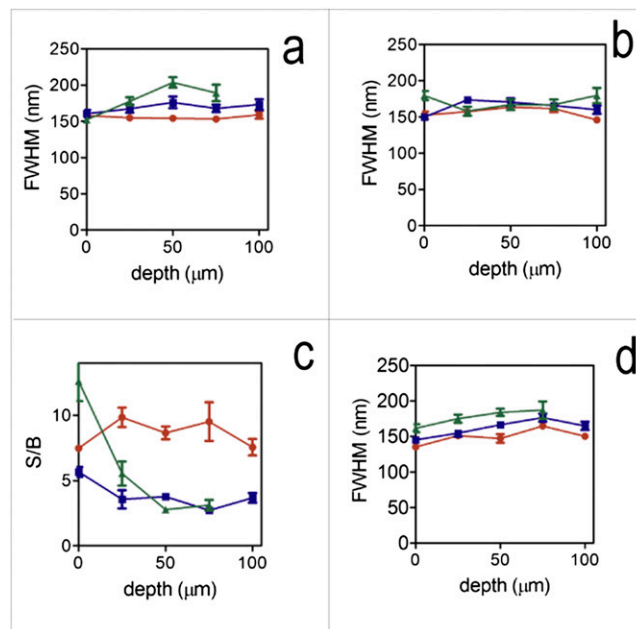

**Fig. 55.** Yellow-green 0.1- $\mu\text{m}$  fluorescent beads suspended in 3% agarose gel were imaged as a function of depth and scattering. When the laser powers are normalized based on emission intensity using the nonscattering sample, beads are visible with 2P-MSIM whereas very few beads are visible with 1P-MSIM at depths greater than 50  $\mu\text{m}$ . Nevertheless, the FWHM values of the observed beads remain constant. The measurements of FWHM as a function of depth in 0% (red circles), 0.13% (blue squares), or 0.26% (green triangles) nonfluorescent polystyrene beads are shown for (A) 1P- and (B) 2P-MSIM. Similar results were obtained when the 488 laser power was normalized by photobleaching rate. Again, signal-to-background (S/B) in 1P-MSIM (C), as defined by the ratio of the amplitude over offset of a Gaussian fit to 1D plot profiles, decreased with depth in the scattering samples at a greater rate than with 850-nm excitation (Fig. 2F in the main text). Although the decrease of S/B when normalizing by the photobleaching rate made it difficult to observe beads at large depths when using one-photon excitation, the FWHM of the beads that were observed displayed little dependence on either imaging depth or the concentration of scattering beads (D).

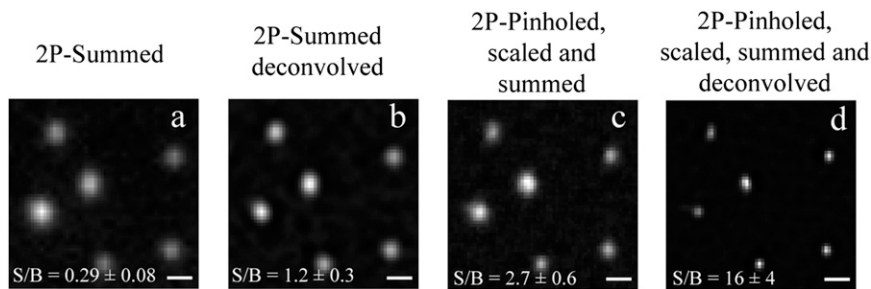

**Fig. 56.** The bead samples with no extra scattering beads were imaged using two-photon excitation at  $\sim 1.8 \mu\text{m}$  deep. The images were processed by (A) summing the images (widefield); (B) summing the images before deconvolution (deconvolved widefield); (C) pinholing, scaling, and summing the images (MPSS image); and (D) pinholing, scaling, summing, and deconvolving the images (MSIM). S/B were determined from the amplitude and offset of Gaussian fits to plot profiles of the bead signals. (Scale bars: 0.5  $\mu\text{m}$ .)





**Table S1. Apparent size of subdiffractive beads**

| Excitation | Dimension | Widefield     |                 |           |          |
|------------|-----------|---------------|-----------------|-----------|----------|
|            |           | Widefield, nm | deconvolved, nm | MPSS; nm  | MSIM, nm |
| One-photon | Lateral   | 330 ± 20      | 240 ± 20        | 260 ± 20  | 150 ± 10 |
|            | Axial     | 900 ± 200     | 600 ± 100       | 730 ± 100 | 420 ± 80 |
| Two-photon | Lateral   | 320 ± 70      | 270 ± 20        | 260 ± 20  | 150 ± 20 |
|            | Axial     | 800 ± 100     | 590 ± 70        | 650 ± 70  | 440 ± 50 |

Widefield FWHM of 0.1- $\mu$ m fluorescent beads suspended in 3% agarose gel in water, after deconvolution, after MPSS, and after 1P- or 2P-MSIM and deconvolution. The average lateral FWHM  $\pm$  SD was determined by Gaussian fits of plot profiles of lines on maximum projections of a 5- $\mu$ m volume imaged at 0.2- $\mu$ m intervals. At least 10 beads were measured at 5  $\mu$ m distance from the coverslip. Imaging was performed with an Olympus PSF-corrected 1.2-N.A. water objective lens. MPSS, multifocal-excited, pinholed, scaled, and summed; MSIM, multifocal structured illumination microscopy.

**Table S2. Apparent size of immunolabeled microtubules**

| Excitation | Dimension | Widefield, nm | MPSS; nm  | MSIM, nm  |
|------------|-----------|---------------|-----------|-----------|
| One-photon | Lateral   | 350 ± 40      | 240 ± 20  | 150 ± 20  |
|            | Axial     | 900 ± 200     | 800 ± 100 | 600 ± 100 |
| Two-photon | Lateral   | 360 ± 30      | 260 ± 30  | 160 ± 20  |
|            | Axial     | 900 ± 100     | 700 ± 100 | 500 ± 100 |

U2OS cells were labeled with an anti-tubulin antibody and an Alexa 488-labeled secondary antibody before mounting in ProLong Widefield, nm. Imaging was performed with a PSF-corrected Olympus 1.2-N.A. water objective lens. The apparent FWHM of microtubules was determined by Gaussian fits of plot profiles of lines which were selected to be approximately orthogonal to the long axis of the microtubule. The mean and SDs are calculated from at least 30 measurements.

## Other Supporting Information Files

[Dataset S1 \(DOC\)](#)
